# Supplementary material for: WITHDRAWN: Comparative genome analyses highlight transposon-mediated genome expansion shapes the evolutionary architecture of 3D genomic folding in cotton
Source: Research Square preprint supplement (doi:10.21203/rs.3.rs-93594/v1), 2020-10-30
Supplement: Supplementary file 1 [file afe64c16d413fdfb2406aa39.xlsx]

## Sheet: Table S1
Supplementary Table 1. Summary of Oxford Nanopore sequencing reads.
Species	G. rotundifolium (K2)			G. arboreum (A2)			G. raimondii (D5)
Length	Reads Num	Total Length	Ave Length	Reads Num	Total Length	Ave Length	Reads Num	Total Length	Ave Length
2000~5000	808948	2782637543	3439.82	464763	1624265769	3494.82	325654	1123457621	3450
5000~10000	1096464	8117287082	7403.14	731737	5454060073	7453.57	505036	3767728220	7460
10000~20000	1959883	30195782069	15406.9	3220249	49352329340	15325.6	1966368	31474553561	16006
20000~30000	3615484	90745979632	25099.3	2073795	50701156228	24448.5	1658875	40323025685	24307
30000~40000	2279809	78344378804	34364.4	1126278	38867775786	34509.9	745843	25626388840	34359
40000~50000	1111457	49379680271	44427.9	613410	27284407358	44479.9	318597	14082520427	44202
50000~60000	523930	28434035378	54270.7	313770	17073120259	54412.8	110168	5953567659	54041
60000~70000	181086	11584737066	63973.7	153195	9865276937	64396.8	31306	2000174113	63891
70000~80000	46179	3407836930	73796.2	73799	5491996235	74418.3	7536	555912303	73768
>=80000	13925	1224098821	87906.6	66083	6119782010	92607.5	2356	209814089	89055

## Sheet: Table S2
Supplementary Table 2. Mapping ratio of paired-end sequencing reads to intial contigs.
Categroy	K2	A2	D5
Total reads	882738543	637609260	329863010
Mapped reads	875125308	633862683	321105252
Mapped (%)	0.9914	0.9941	0.9735
Properly mapped reads	794635470	594956931	311263765
Properly mapped (%)	0.9002	0.9331	0.9436

## Sheet: Table S3
Supplementary Table 3. Statistics of Core Eukaryotic Genes Mapping Approach (CEGMA) and Benchmarking Universal Single-Copy Orthologs (BUSCO) estimating genome assemblies.
Species	K2	A2	D5
Number of 458 CEG present in assembly	450	447	451
Percentage of 458 CEGs present in assemblies (%)	0.9825	0.976	0.9847
Number of 248 highly conserved CEGs present	234	235	236
Percentage of 248 highly conserved CEGs present (%)	0.9435	0.9476	0.9516
Complete BUSCOs (C)	1332 (92.50%)	1352 (93.89%)	1374 (95.42%)
Complete and single-copy BUSCOs (S)	1214 (84.31%)	1223 (84.93%)	1218 (84.58%)
Complete and duplicated BUSCOs (D)	118 (8.19%)	129 (8.96%)	156 (10.83%)
Fragmented BUSCOs (F)	19 (1.32%)	17 (1.18%)	13 (0.90%)
Missing BUSCOs (M)	89 (6.18%)	71 (4.93%)	53 (3.68%)
Total Lineage BUSCOs	1440	1440	1440

## Sheet: Table S4
Supplementary Table 4. Comparing A2 genome with previously published genome version.
Genomic feature	HAU_A2	WHU_A2	ICR_A2
Total assemblied size, bp	1621030562	1636985834	1710104083
Number of total scaffolds	948	1269	4516
Total length of gaps, bp	22500	116300	3730000
Contig N50, bp	11691474	1832000	1100000
Scaffold N50, bp	129592444	118841821	113035596
Scaffold N90, bp	93157762	87096684	162124
Percentage of anchoring and ordering	0.9884	0.9219	0.8594
Number of genes	41778	43278	40960

## Sheet: Table S5
Supplementary Table 5. Comparing D5 genome with previously published genome version.
Genomic feature	HAU_D5	USDA_D5	JGI_D5
Total assemblied size, bp	750197587	734884094	761406121
Number of total scaffolds	287	-	1033
Total length of gaps, bp	7900	17400	1870200
Contig N50, bp	17043680	6291832	136998
Scaffold N50, bp	57716579	58819159	62175169
Scaffold N90, bp	49929625	46322098	45765648
Percentage of anchoring and ordering	0.9901	-	0.984
Number of genes	40820	41030	37505

## Sheet: Table S6
Supplementary Table 6. Gene annotation against annotation database. The annotated percentage of genes aligning InterProScan, Swiss-prot, NR and TAIR10 database was calculated against the total gene number in three genomes (41,590 genes in Gossypium rotundifolium (K2) and 41,778 genes in G. arboreum (A2) and 40,820 genes in G. raimondii (D5).
Database	K2		A2		D5
	Gene number	Percentage	Gene number	Percentage	Gene number	Percentage
Pfam	30833	0.741356	31422	0.752118	30866	0.756149
SATase	29043	0.698317	29547	0.707238	29445	0.721338
GO	17810	0.428228	18211	0.435899	18412	0.451053
KEGG	2120	0.0509738	2205	0.052779	2176	0.0533072
Reactome	4910	0.118057	5047	0.120805	5110	0.125184
NR	41184	0.990238	41624	0.996314	40653	0.995909
TAIR10	21507	0.517119	21491	0.514409	22228	0.544537
Total Annotated	41184	0.9902	41624	0.9963	40653	0.9959

## Sheet: Table S7
Supplementary Table 7. Non-coding RNAs annotation in three reference genomes.
Category	K2	A2	D5
Number of snoRNA	16890	7742	2248
Number of snRNA	202	134	113
Number of tRNA	1796	1730	1344
Number of rRNA	1762	1294	2708
Number of miRNA	132	133	122
Number of total non-coding RNAs	20782	11033	6535
Number of snoRNA, bp	1785749	237240	1785749
Number of snRNA, bp	29640	16888	29640
Number of tRNA, bp	132627	99246	132627
Number of rRNA, bp	657506	858471	657506
Number of miRNA, bp	15221	14102	15221
Number of total non-coding RNAs, bp	2620743	1225947	2620743

## Sheet: Table S8
Supplementary Table 8. Identification of centromeres in Gossypium rotundifolium (K2), G. arboreum (A2) and G. raimondii (D5) genomes. The query LTRs (GhCR1-GhCR4) were from the previous published sequences. The 95% confidence interval for the median (CIM) region was identified as the centromeres region for each chromosome. The 'NA' represent the non aligned genome position.
LTRs	Chr	Start	End	Size of 95% CIM (Mb)	Aligned number	Genome
GhCR1_5'LTR	Chr01	94900000	103820000	8.92	280	K2
GhCR1_5'LTR	Chr02	77040000	82530000	5.49	259	K2
GhCR1_5'LTR	Chr03	103860000	127680000	23.82	64	K2
GhCR1_5'LTR	Chr04	66750000	105650000	38.9	24	K2
GhCR1_5'LTR	Chr05	50380000	58870000	8.49	87	K2
GhCR1_5'LTR	Chr06	72420000	84380000	11.96	219	K2
GhCR1_5'LTR	Chr07	78870000	104710000	25.84	46	K2
GhCR1_5'LTR	Chr08	113230000	124810000	11.58	221	K2
GhCR1_5'LTR	Chr09	54500000	59030000	4.53	341	K2
GhCR1_5'LTR	Chr10	81120000	92310000	11.19	132	K2
GhCR1_5'LTR	Chr11	68900000	82290000	13.39	102	K2
GhCR1_5'LTR	Chr12	75410000	94310000	18.9	82	K2
GhCR1_5'LTR	Chr13	72880000	87340000	14.46	72	K2
GhCR2_5'LTR	Chr01	98400000	114070000	15.67	94	K2
GhCR2_5'LTR	Chr02	76630000	81630000	5	354	K2
GhCR2_5'LTR	Chr03	126500000	144320000	17.82	9	K2
GhCR2_5'LTR	Chr04	NA	NA	0	1	K2
GhCR2_5'LTR	Chr05	NA	NA	0	2	K2
GhCR2_5'LTR	Chr06	NA	NA	0	1	K2
GhCR2_5'LTR	Chr07	99830000	111120000	11.29	82	K2
GhCR2_5'LTR	Chr08	99940000	158300000	58.36	8	K2
GhCR2_5'LTR	Chr09	54570000	61870000	7.3	156	K2
GhCR2_5'LTR	Chr10	50770000	83780000	33.01	2	K2
GhCR2_5'LTR	Chr11	69990000	87910000	17.92	43	K2
GhCR2_5'LTR	Chr12	83870000	95360000	11.49	133	K2
GhCR2_5'LTR	Chr13	103950000	111150000	7.2	432	K2
GhCR3_5'LTR	Chr01	93160000	103840000	10.68	199	K2
GhCR3_5'LTR	Chr02	79170000	83500000	4.33	382	K2
GhCR3_5'LTR	Chr03	89840000	125990000	36.15	20	K2
GhCR3_5'LTR	Chr04	75390000	105160000	29.77	34	K2
GhCR3_5'LTR	Chr05	23430000	72320000	48.89	11	K2
GhCR3_5'LTR	Chr06	73280000	85680000	12.4	211	K2
GhCR3_5'LTR	Chr07	84540000	102500000	17.96	79	K2
GhCR3_5'LTR	Chr08	108970000	119080000	10.11	247	K2
GhCR3_5'LTR	Chr09	55430000	60040000	4.61	349	K2
GhCR3_5'LTR	Chr10	77050000	86090000	9.04	217	K2
GhCR3_5'LTR	Chr11	72490000	85310000	9.94	104	K2
GhCR3_5'LTR	Chr12	80410000	90350000	9.94	188	K2
GhCR3_5'LTR	Chr13	84100000	91930000	7.83	77	K2
GhCR4_5'LTR	Chr01	92210000	101790000	9.58	232	K2
GhCR4_5'LTR	Chr02	68110000	78310000	10.2	122	K2
GhCR4_5'LTR	Chr03	91490000	98850000	7.36	3	K2
GhCR4_5'LTR	Chr04	79330000	97910000	18.58	68	K2
GhCR4_5'LTR	Chr05	16880000	67410000	50.53	9	K2
GhCR4_5'LTR	Chr06	67080000	67080000	0	1	K2
GhCR4_5'LTR	Chr07	84570000	101680000	17.11	91	K2
GhCR4_5'LTR	Chr08	101190000	117300000	16.11	106	K2
GhCR4_5'LTR	Chr09	53780000	69430000	15.65	40	K2
GhCR4_5'LTR	Chr10	50770000	83780000	33.01	24	K2
GhCR4_5'LTR	Chr11	NA	NA	NA	0	K2
GhCR4_5'LTR	Chr12	NA	NA	NA	0	K2
GhCR4_5'LTR	Chr13	84200000	87150000	2.95	61	K2
GhCR1_5'LTR	Chr01	54060000	56380000	2.32	814	A2
GhCR1_5'LTR	Chr02	61420000	6.499e+07	3.57	596	A2
GhCR1_5'LTR	Chr03	74140000	79570000	5.43	235	A2
GhCR1_5'LTR	Chr04	62600000	65580000	2.98	222	A2
GhCR1_5'LTR	Chr05	52930000	54490000	1.56	366	A2
GhCR1_5'LTR	Chr06	68150000	70480000	2.33	646	A2
GhCR1_5'LTR	Chr07	3.291e+07	35870000	2.96	370	A2
GhCR1_5'LTR	Chr08	78360000	80760000	2.4	812	A2
GhCR1_5'LTR	Chr09	32570000	34050000	1.48	792	A2
GhCR1_5'LTR	Chr10	6.652e+07	68730000	2.21	566	A2
GhCR1_5'LTR	Chr11	74550000	77470000	2.92	398	A2
GhCR1_5'LTR	Chr12	32570000	34040000	1.47	231	A2
GhCR1_5'LTR	Chr13	54320000	57200000	2.88	247	A2
GhCR2_5'LTR	Chr01	51180000	55110000	3.93	399	A2
GhCR2_5'LTR	Chr02	59480000	62580000	3.1	760	A2
GhCR2_5'LTR	Chr03	73680000	78970000	5.29	108	A2
GhCR2_5'LTR	Chr04	59560000	67620000	8.06	25	A2
GhCR2_5'LTR	Chr05	51490000	59850000	8.36	15	A2
GhCR2_5'LTR	Chr06	65530000	72300000	6.77	15	A2
GhCR2_5'LTR	Chr07	29470000	3.273e+07	3.26	303	A2
GhCR2_5'LTR	Chr08	69850000	77910000	8.06	96	A2
GhCR2_5'LTR	Chr09	30500000	3.259e+07	2.09	487	A2
GhCR2_5'LTR	Chr10	70060000	76630000	6.57	33	A2
GhCR2_5'LTR	Chr11	70600000	78750000	8.15	307	A2
GhCR2_5'LTR	Chr12	48780000	55150000	6.37	296	A2
GhCR2_5'LTR	Chr13	50340000	52900000	2.56	884	A2
GhCR3_5'LTR	Chr01	53850000	56300000	2.45	669	A2
GhCR3_5'LTR	Chr02	59100000	61850000	2.75	834	A2
GhCR3_5'LTR	Chr03	72420000	78180000	5.76	141	A2
GhCR3_5'LTR	Chr04	61850000	6.462e+07	2.77	247	A2
GhCR3_5'LTR	Chr05	53750000	55510000	1.76	98	A2
GhCR3_5'LTR	Chr06	67900000	70630000	2.73	578	A2
GhCR3_5'LTR	Chr07	32830000	35280000	2.45	552	A2
GhCR3_5'LTR	Chr08	75410000	78240000	2.83	658	A2
GhCR3_5'LTR	Chr09	31900000	33220000	1.32	908	A2
GhCR3_5'LTR	Chr10	67180000	69150000	1.97	908	A2
GhCR3_5'LTR	Chr11	74870000	77550000	2.68	482	A2
GhCR3_5'LTR	Chr12	41040000	44260000	3.22	460	A2
GhCR3_5'LTR	Chr13	55160000	58390000	3.23	272	A2
GhCR4_5'LTR	Chr01	55390000	58030000	2.64	684	A2
GhCR4_5'LTR	Chr02	61500000	6.577e+07	4.27	509	A2
GhCR4_5'LTR	Chr03	73220000	79570000	6.35	51	A2
GhCR4_5'LTR	Chr04	60460000	63220000	2.76	387	A2
GhCR4_5'LTR	Chr05	52710000	57140000	4.43	72	A2
GhCR4_5'LTR	Chr06	70720000	71470000	0.75	15	A2
GhCR4_5'LTR	Chr07	31550000	33940000	2.39	538	A2
GhCR4_5'LTR	Chr08	72350000	77040000	4.69	374	A2
GhCR4_5'LTR	Chr09	32530000	35320000	2.79	281	A2
GhCR4_5'LTR	Chr10	69440000	72490000	3.05	206	A2
GhCR4_5'LTR	Chr11	79240000	79340000	0.1	9	A2
GhCR4_5'LTR	Chr12	35546823	35853937	0.307114	14	A2
GhCR4_5'LTR	Chr13	53500000	57310000	3.81	278	A2
GhCR1_5'LTR	Chr01	27470000	29020000	1.55	230	D5
GhCR1_5'LTR	Chr02	17900000	19310000	1.41	249	D5
GhCR1_5'LTR	Chr03	27380000	30690000	3.31	79	D5
GhCR1_5'LTR	Chr04	18490000	29010000	10.52	18	D5
GhCR1_5'LTR	Chr05	35760000	38160000	2.4	121	D5
GhCR1_5'LTR	Chr06	30080000	32420000	2.34	194	D5
GhCR1_5'LTR	Chr07	14760000	18480000	3.72	60	D5
GhCR1_5'LTR	Chr08	27760000	30620000	2.86	231	D5
GhCR1_5'LTR	Chr09	16820000	18190000	1.37	305	D5
GhCR1_5'LTR	Chr10	31440000	34210000	2.77	167	D5
GhCR1_5'LTR	Chr11	23510000	26070000	2.56	92	D5
GhCR1_5'LTR	Chr12	23810000	26750000	2.94	82	D5
GhCR1_5'LTR	Chr13	24670000	27510000	2.84	86	D5
GhCR2_5'LTR	Chr01	25790000	29270000	3.48	74	D5
GhCR2_5'LTR	Chr02	17710000	19100000	1.39	309	D5
GhCR2_5'LTR	Chr03	28740000	31910000	3.17	26	D5
GhCR2_5'LTR	Chr04	NA	NA	0	0	D5
GhCR2_5'LTR	Chr05	37770000	38460000	0.69	5	D5
GhCR2_5'LTR	Chr06	32830000	36180000	3.35	4	D5
GhCR2_5'LTR	Chr07	16920000	18860000	1.94	101	D5
GhCR2_5'LTR	Chr08	21770000	37420000	15.65	12	D5
GhCR2_5'LTR	Chr09	15410000	17140000	1.73	150	D5
GhCR2_5'LTR	Chr10	30410000	43450000	13.04	9	D5
GhCR2_5'LTR	Chr11	21140000	27950000	6.81	35	D5
GhCR2_5'LTR	Chr12	26410000	29750000	3.34	113	D5
GhCR2_5'LTR	Chr13	20150000	21870000	1.72	410	D5
GhCR3_5'LTR	Chr01	26610000	28720000	2.11	152	D5
GhCR3_5'LTR	Chr02	17410000	18700000	1.29	346	D5
GhCR3_5'LTR	Chr03	25430000	30620000	5.19	42	D5
GhCR3_5'LTR	Chr04	20640000	29810000	9.17	21	D5
GhCR3_5'LTR	Chr05	37490000	40520000	3.03	30	D5
GhCR3_5'LTR	Chr06	29570000	31990000	2.42	189	D5
GhCR3_5'LTR	Chr07	16000000	18950000	2.95	98	D5
GhCR3_5'LTR	Chr08	28220000	30870000	2.65	235	D5
GhCR3_5'LTR	Chr09	16710000	18120000	1.41	322	D5
GhCR3_5'LTR	Chr10	31680000	33500000	1.82	303	D5
GhCR3_5'LTR	Chr11	23810000	27000000	3.19	98	D5
GhCR3_5'LTR	Chr12	24700000	26950000	2.25	166	D5
GhCR3_5'LTR	Chr13	24590000	27420000	2.83	86	D5
GhCR4_5'LTR	Chr01	27390000	29010000	1.62	202	D5
GhCR4_5'LTR	Chr02	18010000	20430000	2.42	117	D5
GhCR4_5'LTR	Chr03	28340000	31790000	3.45	25	D5
GhCR4_5'LTR	Chr04	24610000	29120000	4.51	50	D5
GhCR4_5'LTR	Chr05	35630000	39610000	3.98	23	D5
GhCR4_5'LTR	Chr06	3.262e+07	3.337e+07	0.75	3	D5
GhCR4_5'LTR	Chr07	16930000	19840000	2.91	113	D5
GhCR4_5'LTR	Chr08	28330000	3.274e+07	4.41	96	D5
GhCR4_5'LTR	Chr09	15880000	20130000	4.25	43	D5
GhCR4_5'LTR	Chr10	32000000	36550000	4.55	28	D5
GhCR4_5'LTR	Chr11	22910000	24910000	2	5	D5
GhCR4_5'LTR	Chr12	18710000	27230000	8.52	5	D5
GhCR4_5'LTR	Chr13	21900000	26670000	4.77	68	D5

## Sheet: Table S9
Supplementary Table 9. Repeat sequences annotation in three reference genomes.
Type	K2 genome			A2 genome			D5 genome
	Number	Length	Rate(%)	Number	Length	Rate(%)	Number	Length	Rate(%)
ClassI	1845882	1761554701	72.07	752140	1029708843	63.52	512855	366459241	48.85
ClassI/DIRS	208170	265530812	10.86	46428	57247181	3.53	22454	17681989	2.36
ClassI/LINE	46566	26567549	1.09	22563	11144887	0.69	16961	8435095	1.12
ClassI/LTR	6452	5275700	0.22	2221	1215167	0.07	2845	2134346	0.28
ClassI/LTR/Copia	165283	100180549	4.1	99093	70986298	4.38	100198	65618612	8.75
ClassI/LTR/Gypsy	1027298	1362306179	55.73	433728	811948973	50.09	227963	222846536	29.71
ClassI/PLE|LARD	385545	228535802	9.35	145044	76370438	4.71	138508	48017665	6.4
ClassI/SINE	3732	766796	0.03	2184	338174	0.02	2451	630576	0.08
ClassI/TRIM	1998	1785372	0.07	541	341001	0.02	1274	1055822	0.14
ClassI/Unknown	838	182588	0.01	338	117154	0.01	201	38600	0.01
ClassII	130719	92953540	3.8	62789	29322186	1.81	47602	23435323	3.12
ClassII/Crypton	13	674	0	420	124155	0.01	118	57091	0.01
ClassII/Helitron	22574	7174610	0.29	25250	7095364	0.44	16086	4588753	0.61
ClassII/MITE	1957	449779	0.02	5815	1761091	0.11	855	199121	0.03
ClassII/Maverick	2691	1488785	0.06	73	154323	0.01	1180	229788	0.03
ClassII/TIR	100218	83735745	3.43	28888	19553358	1.21	27621	17919321	2.39
ClassII/Unknown	3266	820869	0.03	2343	633895	0.04	1742	441249	0.06
PotentialHostGene	19687	6541636	0.27	19757	5904949	0.36	15206	4020009	0.54
SSR	6430	1747735	0.07	2806	440265	0.03	3592	661886	0.09
Unknown	256679	115239255	4.71	102305	37689258	2.33	103296	33335459	4.44
Total	2002718	1978036867	80.92	837492	1103057320	68.05	579255	427911877	57.04

## Sheet: Table S10
Supplementary Table 10. Summary of A/B compartment switching genes in K2 versus A2 genome.
K2	Status	A2	Status
Grot_01G019560	A	Garb_01G019330	B
Grot_01G019800	A	Garb_01G019580	B
Grot_01G022060	B	Garb_01G021690	A
Grot_01G022150	B	Garb_01G021720	A
Grot_01G022600	B	Garb_01G022140	A
Grot_01G022940	B	Garb_01G022420	A
Grot_01G022980	B	Garb_01G022520	A
Grot_01G017290	A	Garb_01G017760	B
Grot_01G017350	A	Garb_01G017780	B
Grot_01G017370	A	Garb_01G017810	B
Grot_01G015570	A	Garb_01G014430	B
Grot_01G013020	A	Garb_01G016620	B
Grot_01G016420	B	Garb_01G015580	A
Grot_01G016310	A	Garb_01G015770	B
Grot_01G011880	B	Garb_01G015900	A
Grot_01G012480	A	Garb_01G012710	B
Grot_01G012170	A	Garb_01G013360	B
Grot_01G016240	B	Garb_01G014000	A
Grot_02G006990	A	Garb_01G006930	B
Grot_02G007580	A	Garb_01G007600	B
Grot_02G007730	B	Garb_01G007720	A
Grot_02G010770	B	Garb_01G011020	A
Grot_02G011210	A	Garb_01G011470	B
Grot_02G009970	A	Garb_01G010190	B
Grot_02G009980	A	Garb_01G010200	B
Grot_02G008910	A	Garb_01G009550	B
Grot_02G008900	A	Garb_01G009600	B
Grot_02G010290	A	Garb_01G010910	B
Grot_02G009930	A	Garb_01G009740	B
Grot_01G008990	B	Garb_02G014520	A
Grot_01G009070	B	Garb_02G014570	A
Grot_01G009090	A	Garb_02G013270	B
Grot_01G009270	A	Garb_02G013490	B
Grot_01G009280	A	Garb_02G013500	B
Grot_01G007210	B	Garb_02G012750	A
Grot_01G007220	B	Garb_02G012760	A
Grot_01G007590	B	Garb_02G013080	A
Grot_01G007020	B	Garb_02G010490	A
Grot_01G006990	B	Garb_02G010500	A
Grot_01G006680	B	Garb_02G010830	A
Grot_01G006670	B	Garb_02G010840	A
Grot_01G006570	B	Garb_02G010940	A
Grot_01G007990	A	Garb_02G011580	B
Grot_01G007870	B	Garb_02G011750	A
Grot_01G007860	B	Garb_02G011760	A
Grot_02G014070	B	Garb_02G007460	A
Grot_02G014350	B	Garb_02G007800	A
Grot_02G014380	B	Garb_02G007820	A
Grot_02G014510	B	Garb_02G007950	A
Grot_02G014670	B	Garb_02G008100	A
Grot_02G014680	B	Garb_02G008110	A
Grot_02G012690	A	Garb_02G009740	B
Grot_02G012860	B	Garb_02G009900	A
Grot_02G013060	B	Garb_02G010220	A
Grot_02G013070	B	Garb_02G010230	A
Grot_02G013080	B	Garb_02G010240	A
Grot_02G016560	B	Garb_02G004620	A
Grot_02G016500	B	Garb_02G004680	A
Grot_02G015390	B	Garb_02G006020	A
Grot_02G015340	B	Garb_02G006080	A
Grot_02G015290	B	Garb_02G006300	A
Grot_02G014980	B	Garb_02G006580	A
Grot_02G012160	B	Garb_02G009070	A
Grot_02G013380	B	Garb_02G009530	A
Grot_02G013270	A	Garb_02G009630	B
Grot_03G008020	B	Garb_03G008300	A
Grot_03G008110	B	Garb_03G008330	A
Grot_03G008640	A	Garb_03G008880	B
Grot_03G010100	B	Garb_03G010500	A
Grot_03G010110	B	Garb_03G010510	A
Grot_03G010920	A	Garb_03G011180	B
Grot_03G010930	A	Garb_03G011200	B
Grot_03G022470	B	Garb_03G021990	A
Grot_03G012120	A	Garb_03G011860	B
Grot_03G012560	B	Garb_03G012140	A
Grot_03G012790	A	Garb_03G012330	B
Grot_03G013200	B	Garb_03G012690	A
Grot_03G014850	A	Garb_03G014200	B
Grot_03G021320	B	Garb_03G020490	A
Grot_03G020230	A	Garb_03G014950	B
Grot_03G020270	A	Garb_03G019030	B
Grot_03G016240	A	Garb_03G016710	B
Grot_03G016330	B	Garb_03G016800	A
Grot_03G016430	A	Garb_03G016940	B
Grot_03G016460	A	Garb_03G016960	B
Grot_03G016530	A	Garb_03G017010	B
Grot_03G016550	A	Garb_03G017020	B
Grot_03G016580	A	Garb_03G017060	B
Grot_03G019320	A	Garb_03G017850	B
Grot_03G019370	A	Garb_03G017920	B
Grot_03G015270	A	Garb_03G018560	B
Grot_03G015290	A	Garb_03G018620	B
Grot_03G017420	B	Garb_03G018180	A
Grot_03G016960	B	Garb_03G018230	A
Grot_03G017270	A	Garb_03G016400	B
Grot_03G018750	A	Garb_03G016240	B
Grot_03G018810	B	Garb_03G016280	A
Grot_03G014970	B	Garb_03G015980	A
Grot_03G016310	A	Garb_03G017230	B
Grot_03G016210	A	Garb_03G017250	B
Grot_03G016140	A	Garb_03G017290	B
Grot_03G018590	B	Garb_03G015170	A
Grot_03G018470	B	Garb_03G015300	A
Grot_03G018320	B	Garb_03G015370	A
Grot_03G021170	B	Garb_03G019840	A
Grot_03G020980	B	Garb_03G020000	A
Grot_03G019550	B	Garb_03G014430	A
Grot_03G016810	B	Garb_03G018370	A
Grot_03G016740	A	Garb_03G018440	B
Grot_04G016380	B	Garb_04G016370	A
Grot_04G016530	B	Garb_04G016540	A
Grot_04G017230	B	Garb_04G017240	A
Grot_04G017380	B	Garb_04G017380	A
Grot_04G018280	B	Garb_04G018280	A
Grot_04G018940	B	Garb_04G018890	A
Grot_04G005570	B	Garb_04G005910	A
Grot_04G006330	B	Garb_04G006850	A
Grot_04G006370	A	Garb_04G006880	B
Grot_04G007190	B	Garb_04G007740	A
Grot_04G007200	B	Garb_04G007750	A
Grot_04G011900	A	Garb_04G013320	B
Grot_04G010780	A	Garb_04G011730	B
Grot_04G010840	B	Garb_04G011780	A
Grot_04G012480	A	Garb_04G012590	B
Grot_04G012490	A	Garb_04G012610	B
Grot_04G010500	A	Garb_04G008190	B
Grot_04G010140	B	Garb_04G008760	A
Grot_04G010130	B	Garb_04G008770	A
Grot_04G009560	A	Garb_04G009180	B
Grot_04G008940	B	Garb_04G009720	A
Grot_04G010620	B	Garb_04G010600	A
Grot_04G010600	B	Garb_04G010640	A
Grot_04G010450	A	Garb_04G010830	B
Grot_04G013360	A	Garb_04G012230	B
Grot_04G013330	B	Garb_04G012300	A
Grot_04G013320	B	Garb_04G012310	A
Grot_04G013540	A	Garb_04G011340	B
Grot_04G013390	A	Garb_04G011530	B
Grot_05G003060	A	Garb_05G040220	B
Grot_05G003190	A	Garb_05G040450	B
Grot_05G003200	A	Garb_05G040500	B
Grot_05G003230	A	Garb_05G040580	B
Grot_05G003890	A	Garb_05G041290	B
Grot_05G003930	A	Garb_05G041370	B
Grot_05G000200	A	Garb_05G036170	B
Grot_05G000280	A	Garb_05G036340	B
Grot_05G000370	A	Garb_05G036550	B
Grot_05G000380	A	Garb_05G036560	B
Grot_05G000390	A	Garb_05G036570	B
Grot_05G000400	A	Garb_05G036580	B
Grot_05G000660	A	Garb_05G036940	B
Grot_05G001810	A	Garb_05G037890	B
Grot_05G012680	A	Garb_05G027790	B
Grot_05G012960	A	Garb_05G028100	B
Grot_05G012970	A	Garb_05G028120	B
Grot_05G013430	B	Garb_05G028520	A
Grot_05G011930	A	Garb_05G029180	B
Grot_05G011980	A	Garb_05G029210	B
Grot_05G006520	A	Garb_05G033230	B
Grot_05G006620	A	Garb_05G033280	B
Grot_05G006860	A	Garb_05G033460	B
Grot_05G006890	A	Garb_05G033480	B
Grot_05G006910	A	Garb_05G033500	B
Grot_05G006920	A	Garb_05G033510	B
Grot_05G006930	A	Garb_05G033520	B
Grot_05G007010	A	Garb_05G033530	B
Grot_05G007020	A	Garb_05G033540	B
Grot_05G007030	A	Garb_05G033550	B
Grot_05G007070	A	Garb_05G033560	B
Grot_05G009220	A	Garb_05G032390	B
Grot_05G009240	A	Garb_05G032410	B
Grot_05G009250	A	Garb_05G032420	B
Grot_05G009340	A	Garb_05G032560	B
Grot_05G002460	A	Garb_05G041420	B
Grot_05G002490	A	Garb_05G041430	B
Grot_05G008480	B	Garb_05G033990	A
Grot_05G015520	B	Garb_05G025390	A
Grot_05G015510	B	Garb_05G025400	A
Grot_05G014950	A	Garb_05G026350	B
Grot_05G014940	A	Garb_05G026360	B
Grot_05G014490	B	Garb_05G026840	A
Grot_05G014450	B	Garb_05G026870	A
Grot_05G014440	B	Garb_05G026880	A
Grot_05G013960	A	Garb_05G027320	B
Grot_05G013810	A	Garb_05G027510	B
Grot_05G013790	A	Garb_05G027520	B
Grot_05G013770	A	Garb_05G027550	B
Grot_05G013750	A	Garb_05G027580	B
Grot_05G013740	A	Garb_05G027590	B
Grot_05G013680	A	Garb_05G027640	B
Grot_05G013670	A	Garb_05G027650	B
Grot_05G013660	A	Garb_05G027740	B
Grot_05G013650	A	Garb_05G027750	B
Grot_05G013640	A	Garb_05G027760	B
Grot_05G013630	A	Garb_05G027770	B
Grot_05G013620	A	Garb_05G027780	B
Grot_05G013580	A	Garb_05G027920	B
Grot_05G011540	A	Garb_05G030000	B
Grot_05G011520	A	Garb_05G030010	B
Grot_05G011510	A	Garb_05G030020	B
Grot_05G011450	A	Garb_05G030060	B
Grot_05G011390	A	Garb_05G030070	B
Grot_05G011370	A	Garb_05G030250	B
Grot_05G011240	A	Garb_05G030450	B
Grot_05G011230	A	Garb_05G030460	B
Grot_05G011160	A	Garb_05G030510	B
Grot_05G011110	A	Garb_05G030550	B
Grot_05G011070	A	Garb_05G030620	B
Grot_05G011060	A	Garb_05G030640	B
Grot_05G011000	A	Garb_05G030690	B
Grot_05G010850	A	Garb_05G030870	B
Grot_05G010840	A	Garb_05G030880	B
Grot_05G010770	A	Garb_05G030900	B
Grot_05G010750	A	Garb_05G030940	B
Grot_05G010730	A	Garb_05G030960	B
Grot_05G010570	A	Garb_05G031050	B
Grot_05G010560	A	Garb_05G031060	B
Grot_05G010540	A	Garb_05G031070	B
Grot_05G010530	A	Garb_05G031080	B
Grot_05G010520	A	Garb_05G031100	B
Grot_05G010500	A	Garb_05G031110	B
Grot_05G010430	A	Garb_05G031140	B
Grot_05G010420	A	Garb_05G031150	B
Grot_05G010300	A	Garb_05G031270	B
Grot_05G010290	A	Garb_05G031280	B
Grot_05G010280	A	Garb_05G031290	B
Grot_05G010270	A	Garb_05G031300	B
Grot_05G010260	A	Garb_05G031310	B
Grot_05G010250	A	Garb_05G031320	B
Grot_05G010240	A	Garb_05G031330	B
Grot_05G010230	A	Garb_05G031340	B
Grot_05G010190	A	Garb_05G031380	B
Grot_05G010170	A	Garb_05G031400	B
Grot_05G010140	A	Garb_05G031420	B
Grot_05G010080	A	Garb_05G031490	B
Grot_05G010070	A	Garb_05G031500	B
Grot_05G010030	A	Garb_05G031530	B
Grot_05G009950	A	Garb_05G031610	B
Grot_05G009940	A	Garb_05G031620	B
Grot_05G009930	A	Garb_05G031640	B
Grot_05G009920	A	Garb_05G031650	B
Grot_05G004220	A	Garb_05G039810	B
Grot_05G004090	A	Garb_05G040070	B
Grot_05G008390	A	Garb_05G034050	B
Grot_05G008370	B	Garb_05G034070	A
Grot_05G008260	A	Garb_05G034150	B
Grot_05G008240	A	Garb_05G034170	B
Grot_05G008030	A	Garb_05G034300	B
Grot_05G007980	A	Garb_05G034370	B
Grot_05G007970	A	Garb_05G034380	B
Grot_05G007860	A	Garb_05G034490	B
Grot_05G007850	A	Garb_05G034500	B
Grot_05G007840	A	Garb_05G034510	B
Grot_05G007830	A	Garb_05G034520	B
Grot_05G007820	A	Garb_05G034540	B
Grot_05G007790	A	Garb_05G034580	B
Grot_05G007780	A	Garb_05G034590	B
Grot_05G007770	A	Garb_05G034600	B
Grot_05G007670	A	Garb_05G034650	B
Grot_05G007650	A	Garb_05G034750	B
Grot_05G007630	A	Garb_05G034790	B
Grot_05G008980	B	Garb_05G031790	A
Grot_05G008970	B	Garb_05G031810	A
Grot_05G008960	B	Garb_05G031820	A
Grot_05G008860	A	Garb_05G031900	B
Grot_05G008850	A	Garb_05G031910	B
Grot_05G008830	A	Garb_05G031920	B
Grot_05G008640	A	Garb_05G032060	B
Grot_05G008630	A	Garb_05G032070	B
Grot_05G008550	A	Garb_05G032150	B
Grot_05G006560	A	Garb_05G035370	B
Grot_05G006440	A	Garb_05G035430	B
Grot_05G006410	A	Garb_05G035460	B
Grot_05G006300	A	Garb_05G035620	B
Grot_05G006230	A	Garb_05G035750	B
Grot_05G006220	A	Garb_05G035790	B
Grot_05G006040	A	Garb_05G035910	B
Grot_05G006000	A	Garb_05G035960	B
Grot_05G005920	A	Garb_05G035970	B
Grot_05G005890	A	Garb_05G036010	B
Grot_05G005880	A	Garb_05G036170	B
Grot_05G005870	A	Garb_05G036190	B
Grot_05G012480	A	Garb_05G029040	B
Grot_05G012440	A	Garb_05G029090	B
Grot_05G012430	A	Garb_05G029110	B
Grot_05G012420	A	Garb_05G029140	B
Grot_05G012400	A	Garb_05G029180	B
Grot_05G007420	A	Garb_05G035140	B
Grot_05G007410	A	Garb_05G035160	B
Grot_05G007400	A	Garb_05G035170	B
Grot_05G007390	A	Garb_05G035200	B
Grot_05G007370	A	Garb_05G035220	B
Grot_05G007360	A	Garb_05G035230	B
Grot_05G007350	A	Garb_05G035240	B
Grot_05G007340	A	Garb_05G035260	B
Grot_05G007320	A	Garb_05G035300	B
Grot_05G009590	B	Garb_05G032220	A
Grot_05G009430	A	Garb_05G032290	B
Grot_05G009420	A	Garb_05G032310	B
Grot_05G009410	A	Garb_05G032340	B
Grot_06G016780	A	Garb_06G017660	B
Grot_06G016790	B	Garb_06G017670	A
Grot_06G017150	A	Garb_06G018090	B
Grot_06G017160	A	Garb_06G018140	B
Grot_06G020400	B	Garb_06G020710	A
Grot_06G020430	B	Garb_06G020730	A
Grot_06G020610	B	Garb_06G020860	A
Grot_06G021970	B	Garb_06G022310	A
Grot_06G005490	B	Garb_06G005870	A
Grot_06G007860	B	Garb_06G007970	A
Grot_06G008380	A	Garb_06G008340	B
Grot_06G013550	A	Garb_06G014060	B
Grot_06G013650	B	Garb_06G014110	A
Grot_06G008950	A	Garb_06G009100	B
Grot_06G009010	B	Garb_06G009140	A
Grot_06G013160	A	Garb_06G013370	B
Grot_06G014560	A	Garb_06G014270	B
Grot_06G014610	A	Garb_06G014320	B
Grot_06G014010	A	Garb_06G014760	B
Grot_06G013890	B	Garb_06G014960	A
Grot_06G013780	A	Garb_06G015140	B
Grot_06G012330	B	Garb_06G011090	A
Grot_06G008280	B	Garb_06G008460	A
Grot_06G008220	B	Garb_06G008510	A
Grot_06G008210	B	Garb_06G008520	A
Grot_06G011750	A	Garb_06G012830	B
Grot_06G011520	B	Garb_06G013190	A
Grot_06G011340	B	Garb_06G013300	A
Grot_06G010310	B	Garb_06G012480	A
Grot_06G011410	A	Garb_06G010640	B
Grot_06G011400	A	Garb_06G010650	B
Grot_06G010550	A	Garb_06G010420	B
Grot_06G010540	A	Garb_06G010430	B
Grot_06G010470	A	Garb_06G010490	B
Grot_06G010450	A	Garb_06G010530	B
Grot_06G013160	A	Garb_06G013370	B
Grot_07G017700	A	Garb_07G011560	B
Grot_07G017710	A	Garb_07G011570	B
Grot_07G017920	A	Garb_07G011700	B
Grot_07G017950	A	Garb_07G011720	B
Grot_07G018080	A	Garb_07G011800	B
Grot_07G018090	A	Garb_07G011810	B
Grot_07G018310	A	Garb_07G011890	B
Grot_07G018680	B	Garb_07G012220	A
Grot_07G018700	B	Garb_07G012240	A
Grot_07G018710	B	Garb_07G012250	A
Grot_07G019880	B	Garb_07G009090	A
Grot_07G020320	A	Garb_07G009430	B
Grot_07G020690	A	Garb_07G009570	B
Grot_07G016960	B	Garb_07G012760	A
Grot_07G016970	B	Garb_07G012770	A
Grot_07G017000	B	Garb_07G012780	A
Grot_07G017010	B	Garb_07G012790	A
Grot_07G021760	B	Garb_07G007880	A
Grot_07G021790	B	Garb_07G007900	A
Grot_07G020920	A	Garb_07G008030	B
Grot_07G020970	A	Garb_07G008060	B
Grot_07G022170	B	Garb_07G007510	A
Grot_07G022180	A	Garb_07G007520	B
Grot_07G022230	A	Garb_07G007590	B
Grot_07G022270	A	Garb_07G007600	B
Grot_07G025610	A	Garb_07G010740	B
Grot_07G017760	B	Garb_07G002280	A
Grot_07G017800	B	Garb_07G002300	A
Grot_07G017890	B	Garb_07G002320	A
Grot_07G017960	B	Garb_07G002400	A
Grot_07G016100	B	Garb_07G013670	A
Grot_07G014760	A	Garb_07G014870	B
Grot_07G014660	B	Garb_07G015000	A
Grot_07G014510	B	Garb_07G015090	A
Grot_07G012160	B	Garb_07G017640	A
Grot_07G010140	A	Garb_07G019560	B
Grot_07G010090	A	Garb_07G019610	B
Grot_07G009930	A	Garb_07G019780	B
Grot_07G008860	B	Garb_07G020820	A
Grot_07G008430	B	Garb_07G021240	A
Grot_07G024880	B	Garb_07G004370	A
Grot_07G024870	B	Garb_07G004380	A
Grot_07G024620	B	Garb_07G004620	A
Grot_07G024360	B	Garb_07G005090	A
Grot_07G024120	A	Garb_07G005390	B
Grot_07G024100	A	Garb_07G005420	B
Grot_07G023770	A	Garb_07G006070	B
Grot_07G023740	A	Garb_07G006090	B
Grot_07G023410	A	Garb_07G006500	B
Grot_07G022280	A	Garb_07G007470	B
Grot_07G019670	B	Garb_07G012270	A
Grot_07G019640	B	Garb_07G012320	A
Grot_07G021310	B	Garb_07G009710	A
Grot_07G021040	B	Garb_07G009990	A
Grot_08G009030	B	Garb_08G009720	A
Grot_08G020450	B	Garb_08G022990	A
Grot_08G020540	B	Garb_08G023100	A
Grot_08G021540	B	Garb_08G024150	A
Grot_08G021740	B	Garb_08G024230	A
Grot_08G021930	B	Garb_08G024340	A
Grot_08G021940	B	Garb_08G024350	A
Grot_08G021950	B	Garb_08G024360	A
Grot_08G021980	B	Garb_08G024380	A
Grot_08G022390	B	Garb_08G024690	A
Grot_08G022400	B	Garb_08G024700	A
Grot_08G024100	B	Garb_08G026430	A
Grot_08G024720	B	Garb_08G026960	A
Grot_08G013920	A	Garb_08G015540	B
Grot_08G013940	A	Garb_08G015560	B
Grot_08G013950	A	Garb_08G015570	B
Grot_08G014220	A	Garb_08G015960	B
Grot_08G012690	B	Garb_08G013840	A
Grot_08G012770	B	Garb_08G013890	A
Grot_08G014770	B	Garb_08G016740	A
Grot_08G014920	B	Garb_08G016800	A
Grot_08G015200	B	Garb_08G017010	A
Grot_08G015300	B	Garb_08G017040	A
Grot_08G015320	A	Garb_08G017050	B
Grot_08G015610	A	Garb_08G017460	B
Grot_08G015720	A	Garb_08G017590	B
Grot_08G019150	B	Garb_08G021040	A
Grot_08G019250	A	Garb_08G021160	B
Grot_08G018800	A	Garb_08G021480	B
Grot_08G018840	A	Garb_08G021520	B
Grot_08G018970	B	Garb_08G021640	A
Grot_08G018990	A	Garb_08G021660	B
Grot_08G018350	A	Garb_08G017660	B
Grot_08G019550	A	Garb_08G022340	B
Grot_08G019630	B	Garb_08G022480	A
Grot_08G020120	B	Garb_08G021940	A
Grot_08G020240	B	Garb_08G022050	A
Grot_08G017620	A	Garb_08G018480	B
Grot_08G017530	A	Garb_08G018570	B
Grot_08G017390	B	Garb_08G018640	A
Grot_08G017380	B	Garb_08G018660	A
Grot_08G017370	B	Garb_08G018670	A
Grot_08G016800	B	Garb_08G019010	A
Grot_08G016660	A	Garb_08G019100	B
Grot_08G016640	A	Garb_08G019120	B
Grot_08G016590	A	Garb_08G019140	B
Grot_08G016450	A	Garb_08G019290	B
Grot_08G016440	A	Garb_08G019300	B
Grot_08G016420	A	Garb_08G019340	B
Grot_08G016400	A	Garb_08G019370	B
Grot_08G016240	B	Garb_08G019550	A
Grot_08G016100	A	Garb_08G019640	B
Grot_08G018550	A	Garb_08G020160	B
Grot_09G001880	A	Garb_09G001610	B
Grot_09G001890	A	Garb_09G001620	B
Grot_09G002090	B	Garb_09G001790	A
Grot_09G002180	A	Garb_09G001880	B
Grot_09G002440	A	Garb_09G002500	B
Grot_09G002890	B	Garb_09G002800	A
Grot_09G002900	B	Garb_09G002810	A
Grot_09G002970	B	Garb_09G002880	A
Grot_09G003850	A	Garb_09G003730	B
Grot_09G003860	A	Garb_09G003740	B
Grot_09G003870	A	Garb_09G003750	B
Grot_09G003880	A	Garb_09G003770	B
Grot_09G003890	A	Garb_09G003810	B
Grot_09G003930	A	Garb_09G003880	B
Grot_09G004010	A	Garb_09G003920	B
Grot_09G004020	A	Garb_09G003940	B
Grot_09G004240	A	Garb_09G004180	B
Grot_09G004290	A	Garb_09G004290	B
Grot_09G004300	A	Garb_09G004300	B
Grot_09G004340	B	Garb_09G004500	A
Grot_09G004350	B	Garb_09G004510	A
Grot_09G004360	B	Garb_09G004520	A
Grot_09G004410	A	Garb_09G004580	B
Grot_09G004430	A	Garb_09G004650	B
Grot_09G004440	A	Garb_09G004660	B
Grot_09G004470	A	Garb_09G004680	B
Grot_09G004480	A	Garb_09G004690	B
Grot_09G004570	A	Garb_09G004780	B
Grot_09G005020	A	Garb_09G005320	B
Grot_09G005030	A	Garb_09G005330	B
Grot_09G005220	A	Garb_09G005480	B
Grot_09G005230	A	Garb_09G005490	B
Grot_09G005540	A	Garb_09G005680	B
Grot_09G005840	A	Garb_09G005880	B
Grot_09G005850	A	Garb_09G005890	B
Grot_09G010110	A	Garb_09G010250	B
Grot_09G010120	A	Garb_09G010260	B
Grot_09G010130	A	Garb_09G010270	B
Grot_09G010140	A	Garb_09G010280	B
Grot_09G010150	A	Garb_09G010340	B
Grot_09G010180	A	Garb_09G010350	B
Grot_09G008570	A	Garb_09G008610	B
Grot_09G008680	A	Garb_09G008770	B
Grot_09G008690	A	Garb_09G008790	B
Grot_09G008730	A	Garb_09G008830	B
Grot_09G008840	A	Garb_09G008890	B
Grot_09G007640	B	Garb_09G006680	A
Grot_09G007790	A	Garb_09G006820	B
Grot_09G007800	A	Garb_09G006830	B
Grot_09G007830	B	Garb_09G006860	A
Grot_09G007980	A	Garb_09G007320	B
Grot_09G008000	A	Garb_09G007340	B
Grot_09G013070	A	Garb_09G012950	B
Grot_09G007610	B	Garb_09G007520	A
Grot_09G007460	A	Garb_09G007660	B
Grot_09G007340	B	Garb_09G007780	A
Grot_09G007330	B	Garb_09G007790	A
Grot_09G007040	A	Garb_09G008120	B
Grot_09G006990	A	Garb_09G008150	B
Grot_09G006790	A	Garb_09G008410	B
Grot_09G006670	B	Garb_09G008530	A
Grot_09G009860	B	Garb_09G009480	A
Grot_09G000340	A	Garb_09G000330	B
Grot_09G000240	B	Garb_09G000460	A
Grot_09G006290	B	Garb_09G006360	A
Grot_10G016760	A	Garb_10G009150	B
Grot_10G016770	A	Garb_10G009160	B
Grot_10G016780	B	Garb_10G009170	A
Grot_10G016840	B	Garb_10G009230	A
Grot_10G017230	B	Garb_10G009550	A
Grot_10G018800	B	Garb_10G010860	A
Grot_10G018810	B	Garb_10G010880	A
Grot_10G019830	A	Garb_10G012030	B
Grot_10G008160	A	Garb_10G020960	B
Grot_10G008550	A	Garb_10G021290	B
Grot_10G008920	A	Garb_10G021650	B
Grot_10G008950	A	Garb_10G021680	B
Grot_10G008960	A	Garb_10G021690	B
Grot_10G008990	A	Garb_10G021760	B
Grot_10G010860	B	Garb_10G016180	A
Grot_10G011180	A	Garb_10G016620	B
Grot_10G011430	A	Garb_10G016790	B
Grot_10G011460	B	Garb_10G016840	A
Grot_10G010350	A	Garb_10G019000	B
Grot_10G010390	B	Garb_10G019080	A
Grot_10G010450	B	Garb_10G019150	A
Grot_10G012730	A	Garb_10G017880	B
Grot_10G012760	B	Garb_10G017900	A
Grot_10G012880	B	Garb_10G015900	A
Grot_10G012950	B	Garb_10G015950	A
Grot_10G022790	B	Garb_10G006010	A
Grot_10G021270	B	Garb_10G007680	A
Grot_10G020790	B	Garb_10G008180	A
Grot_10G006690	A	Garb_10G023540	B
Grot_10G004240	B	Garb_10G026060	A
Grot_10G003770	B	Garb_10G026620	A
Grot_10G003760	B	Garb_10G026640	A
Grot_10G016600	A	Garb_10G012140	B
Grot_10G016420	A	Garb_10G012310	B
Grot_10G016410	A	Garb_10G012320	B
Grot_10G016400	A	Garb_10G012330	B
Grot_10G016390	A	Garb_10G012340	B
Grot_10G016310	A	Garb_10G012400	B
Grot_10G016200	B	Garb_10G012480	A
Grot_10G015670	A	Garb_10G013040	B
Grot_10G015650	A	Garb_10G013050	B
Grot_10G015480	B	Garb_10G013280	A
Grot_10G015300	A	Garb_10G013390	B
Grot_10G015260	A	Garb_10G013400	B
Grot_10G015250	A	Garb_10G013410	B
Grot_10G015180	A	Garb_10G013480	B
Grot_10G014090	A	Garb_10G014550	B
Grot_10G010530	B	Garb_10G018960	A
Grot_10G010460	A	Garb_10G019140	B
Grot_10G010240	B	Garb_10G019310	A
Grot_10G010030	A	Garb_10G019790	B
Grot_10G009970	A	Garb_10G019840	B
Grot_10G009700	A	Garb_10G020120	B
Grot_10G009690	A	Garb_10G020140	B
Grot_10G009680	A	Garb_10G020150	B
Grot_10G011670	A	Garb_10G017250	B
Grot_10G012440	A	Garb_10G017450	B
Grot_10G012080	A	Garb_10G017650	B
Grot_10G012060	A	Garb_10G017660	B
Grot_10G012040	A	Garb_10G017670	B
Grot_10G012650	A	Garb_10G018080	B
Grot_10G012620	A	Garb_10G018180	B
Grot_10G012550	B	Garb_10G018240	A
Grot_11G017100	B	Garb_11G023380	A
Grot_11G017160	A	Garb_11G023410	B
Grot_11G017240	A	Garb_11G023480	B
Grot_11G017590	A	Garb_11G023870	B
Grot_11G007800	A	Garb_11G032700	B
Grot_11G007810	A	Garb_11G032710	B
Grot_11G012600	A	Garb_11G026370	B
Grot_11G012620	A	Garb_11G026380	B
Grot_11G012650	A	Garb_11G026430	B
Grot_11G012700	A	Garb_11G026480	B
Grot_11G012720	A	Garb_11G026520	B
Grot_11G012860	A	Garb_11G026720	B
Grot_11G012870	A	Garb_11G026730	B
Grot_11G012880	A	Garb_11G026770	B
Grot_11G011340	A	Garb_11G025910	B
Grot_11G011420	A	Garb_11G025970	B
Grot_11G011510	A	Garb_11G026030	B
Grot_11G014780	B	Garb_11G025090	A
Grot_11G013430	A	Garb_11G029600	B
Grot_11G024090	B	Garb_11G015390	A
Grot_11G022630	B	Garb_11G016870	A
Grot_11G022130	B	Garb_11G017370	A
Grot_11G018880	A	Garb_11G020880	B
Grot_11G018860	A	Garb_11G020890	B
Grot_11G018780	A	Garb_11G020980	B
Grot_11G018700	A	Garb_11G021070	B
Grot_11G018690	A	Garb_11G021080	B
Grot_11G018680	A	Garb_11G021100	B
Grot_11G018670	A	Garb_11G021110	B
Grot_11G018660	A	Garb_11G021150	B
Grot_11G018330	A	Garb_11G021490	B
Grot_11G018310	A	Garb_11G021530	B
Grot_11G018200	A	Garb_11G021640	B
Grot_11G018180	A	Garb_11G021650	B
Grot_11G018140	A	Garb_11G021670	B
Grot_11G018130	A	Garb_11G021680	B
Grot_11G018120	A	Garb_11G021690	B
Grot_11G018090	A	Garb_11G021730	B
Grot_11G018040	B	Garb_11G021790	A
Grot_11G017990	B	Garb_11G021800	A
Grot_11G017970	A	Garb_11G021810	B
Grot_11G017960	A	Garb_11G021830	B
Grot_11G017710	A	Garb_11G022130	B
Grot_11G017670	A	Garb_11G022150	B
Grot_11G017660	A	Garb_11G022180	B
Grot_11G017650	A	Garb_11G022190	B
Grot_11G017630	A	Garb_11G022220	B
Grot_11G005190	A	Garb_11G035880	B
Grot_11G016030	B	Garb_11G023720	A
Grot_11G016020	B	Garb_11G023730	A
Grot_11G015940	B	Garb_11G023810	A
Grot_11G015920	A	Garb_11G023820	B
Grot_11G015910	A	Garb_11G023840	B
Grot_11G015890	A	Garb_11G023850	B
Grot_11G015860	A	Garb_11G023860	B
Grot_11G015810	B	Garb_11G023970	A
Grot_11G015680	B	Garb_11G024030	A
Grot_11G015440	B	Garb_11G024170	A
Grot_11G015410	A	Garb_11G024260	B
Grot_11G010630	A	Garb_11G029790	B
Grot_11G010300	A	Garb_11G030090	B
Grot_11G010120	A	Garb_11G030250	B
Grot_11G009720	A	Garb_11G030600	B
Grot_11G009700	A	Garb_11G030620	B
Grot_11G009650	A	Garb_11G030880	B
Grot_11G009560	A	Garb_11G030920	B
Grot_11G009530	A	Garb_11G030940	B
Grot_11G009430	A	Garb_11G031130	B
Grot_11G009340	A	Garb_11G031220	B
Grot_11G012320	B	Garb_11G027230	A
Grot_11G012290	A	Garb_11G027310	B
Grot_11G012260	B	Garb_11G027320	A
Grot_11G012180	A	Garb_11G027400	B
Grot_11G012170	A	Garb_11G027420	B
Grot_11G012110	A	Garb_11G027520	B
Grot_11G012060	A	Garb_11G027550	B
Grot_11G012040	A	Garb_11G027580	B
Grot_11G012030	A	Garb_11G027590	B
Grot_11G011930	A	Garb_11G027690	B
Grot_11G011890	B	Garb_11G027710	A
Grot_11G010960	A	Garb_11G028950	B
Grot_11G010940	A	Garb_11G028970	B
Grot_11G010890	A	Garb_11G029060	B
Grot_11G013790	B	Garb_11G028480	A
Grot_11G013660	A	Garb_11G028520	B
Grot_11G013130	B	Garb_11G028840	A
Grot_11G011290	B	Garb_11G028000	A
Grot_11G011250	B	Garb_11G028080	A
Grot_11G011140	A	Garb_11G028220	B
Grot_11G011000	A	Garb_11G028280	B
Grot_11G010990	A	Garb_11G028290	B
Grot_12G017140	B	Garb_12G008710	A
Grot_12G017180	A	Garb_12G008760	B
Grot_12G017190	A	Garb_12G008770	B
Grot_12G017270	A	Garb_12G008780	B
Grot_12G012870	B	Garb_12G010290	A
Grot_12G015100	B	Garb_12G012090	A
Grot_12G015130	B	Garb_12G012100	A
Grot_12G015170	A	Garb_12G012180	B
Grot_12G015410	A	Garb_12G009030	B
Grot_12G015500	B	Garb_12G009080	A
Grot_12G015530	B	Garb_12G009090	A
Grot_12G015540	B	Garb_12G009100	A
Grot_12G012650	B	Garb_12G012300	A
Grot_12G012640	B	Garb_12G012310	A
Grot_12G011460	A	Garb_12G013500	B
Grot_12G011440	A	Garb_12G013540	B
Grot_12G011040	B	Garb_12G013940	A
Grot_12G010670	A	Garb_12G014300	B
Grot_12G009470	B	Garb_12G015530	A
Grot_12G007960	B	Garb_12G016910	A
Grot_12G021680	B	Garb_12G003750	A
Grot_12G021270	A	Garb_12G004130	B
Grot_12G021260	A	Garb_12G004140	B
Grot_12G021250	A	Garb_12G004330	B
Grot_12G020570	A	Garb_12G004970	B
Grot_12G019440	B	Garb_12G006180	A
Grot_12G019400	A	Garb_12G006220	B
Grot_12G018330	B	Garb_12G007130	A
Grot_12G017880	B	Garb_12G007570	A
Grot_12G017740	A	Garb_12G007750	B
Grot_12G017610	A	Garb_12G007880	B
Grot_12G017560	B	Garb_12G007940	A
Grot_12G006830	B	Garb_12G018340	A
Grot_12G006760	B	Garb_12G018400	A
Grot_12G006720	B	Garb_12G018430	A
Grot_12G006600	B	Garb_12G018500	A
Grot_12G005930	A	Garb_12G019200	B
Grot_12G016160	A	Garb_12G010490	B
Grot_12G016150	A	Garb_12G010500	B
Grot_13G020650	B	Garb_13G007820	A
Grot_13G021150	B	Garb_13G008200	A
Grot_13G021560	B	Garb_13G008620	A
Grot_13G021580	B	Garb_13G008630	A
Grot_13G021590	B	Garb_13G008640	A
Grot_13G021610	B	Garb_13G008650	A
Grot_13G016670	B	Garb_13G011630	A
Grot_13G016780	B	Garb_13G011690	A
Grot_13G017570	B	Garb_13G011770	A
Grot_13G017580	B	Garb_13G011900	A
Grot_13G017630	B	Garb_13G011950	A
Grot_13G015170	B	Garb_13G014000	A
Grot_13G015150	B	Garb_13G014170	A
Grot_13G015140	B	Garb_13G014180	A
Grot_13G015100	B	Garb_13G014250	A
Grot_13G013860	B	Garb_13G015360	A
Grot_13G013840	A	Garb_13G015380	B
Grot_13G013230	B	Garb_13G015990	A
Grot_13G013180	A	Garb_13G016080	B
Grot_13G013140	A	Garb_13G016200	B
Grot_13G013130	A	Garb_13G016210	B
Grot_13G012820	B	Garb_13G016570	A
Grot_13G012800	B	Garb_13G016590	A
Grot_13G012290	B	Garb_13G017170	A
Grot_13G012280	B	Garb_13G017200	A
Grot_13G012140	B	Garb_13G017320	A
Grot_13G010820	B	Garb_13G018460	A
Grot_13G010700	B	Garb_13G018610	A
Grot_13G010680	B	Garb_13G018640	A
Grot_13G009770	B	Garb_13G019460	A
Grot_13G009730	B	Garb_13G019480	A
Grot_13G007820	B	Garb_13G021820	A
Grot_13G007370	B	Garb_13G022260	A
Grot_13G007350	B	Garb_13G022340	A
Grot_13G007200	B	Garb_13G022500	A
Grot_13G007190	B	Garb_13G022510	A
Grot_13G005550	B	Garb_13G024280	A
Grot_13G020170	B	Garb_13G009190	A
Grot_13G019840	B	Garb_13G009640	A
Grot_13G019350	B	Garb_13G010100	A
Grot_13G019280	B	Garb_13G010180	A
Grot_13G019170	B	Garb_13G010260	A
Grot_13G019040	B	Garb_13G010380	A
Grot_13G018670	A	Garb_13G010600	B
Grot_13G018640	A	Garb_13G010650	B
Grot_13G022670	B	Garb_13G006790	A
Grot_13G022530	B	Garb_13G006910	A
Grot_13G022500	B	Garb_13G006950	A
Grot_13G021710	B	Garb_13G007750	A
Grot_13G021690	B	Garb_13G007790	A
Grot_13G021660	B	Garb_13G007810	A
Grot_13G018710	B	Garb_13G012510	A
Grot_13G018360	B	Garb_13G012700	A
Grot_13G018330	B	Garb_13G012730	A
Grot_13G018320	B	Garb_13G012740	A
Grot_13G018110	A	Garb_13G012890	B
Grot_13G017800	A	Garb_13G013160	B
Grot_13G017540	A	Garb_13G013230	B
Grot_13G017490	A	Garb_13G013410	B
Grot_13G017480	A	Garb_13G013430	B
Grot_13G016450	B	Garb_13G013350	A
Grot_13G016160	B	Garb_13G013550	A
Grot_13G017390	A	Garb_13G010980	B

[truncated: 5 more sheets: Table S11, Table S12, Table S13, Table S14, Table S15]
